1 **Title:** Optimization of an Experimental Vaccine to Prevent *Escherichia coli* Urinary Tract  
2 Infection

3

4 **Running Title:** Optimization of a UPEC vaccine

5

6 **Authors:** Valerie S. Forsyth<sup>a</sup>, Stephanie D. Himpsl<sup>a</sup>, Sara N. Smith<sup>a</sup>, Christina A. Sarkissian<sup>a\*</sup>,  
7 Laura A. Mike<sup>a</sup>, Jolie A. Stocki<sup>a</sup>, Anna Sintsova<sup>a\*</sup>, Christopher J. Alteri<sup>a,b</sup>, Harry L.T. Mobley<sup>a#</sup>

8

9 **Author Affiliations:**

10 <sup>a</sup>Department of Microbiology and Immunology; University of Michigan Medical School; Ann  
11 Arbor, MI, 48109; United States

12 <sup>b</sup>Department of Natural Sciences; University of Michigan Dearborn; Dearborn, MI, 48128;  
13 United States

14

15 **#Corresponding Author:**

16 hmobley@umich.edu (HLTM)

17

18 **\*Present address:**

19 Christina A. Sarkissian, Arbor Biosciences, Ann Arbor, MI, USA.

20 Anna Sintsova, University of Zurich, Zurich, Germany.

21

22 **Abstract word count: 250**

23

24 **Text word count: 4,953**

25

26

27

28

29

30

31 **Abstract (250 words)**

32 Urinary tract infections (UTI) affect half of all women at least once during their lifetime. The  
33 rise in extended-spectrum beta-lactamase-producing strains and potential for carbapenem  
34 resistance within uropathogenic *Escherichia coli* (UPEC), the most common causative agent of  
35 UTIs, creates an urgent need for vaccine development. Intranasal immunization of mice with  
36 UPEC outer membrane iron receptors, FyuA, Hma, IreA, or IutA, conjugated to cholera toxin,  
37 provides protection in the bladder or kidneys when challenged with UPEC CFT073 or 536.  
38 Based on these data, we sought to optimize the vaccination route (intramuscular, intranasal, or  
39 subcutaneous) in combination with adjuvants suitable for human use including alum,  
40 monophosphoryl lipid A (MPLA), unmethylated CpG synthetic oligodeoxynucleotides (CpG),  
41 polyinosinic:polycytidylic acid (polyIC), and mutated heat-labile *E. coli* enterotoxin (dmLT).  
42 Mice intranasally vaccinated with dmLT-IutA or dmLT-Hma displayed a significant reduction in  
43 bladder colonization (86-fold and 32-fold, respectively) with 40–42% of mice having no  
44 detectable colony forming units (CFU). Intranasal vaccination of mice with CpG-IutA and  
45 polyIC-IutA significantly reduced kidney colonization (131-fold) and urine CFU (22-fold),  
46 respectively. dmLT generated the most consistently robust antibody response in intranasally  
47 immunized mice, while MPLA and alum produced greater concentrations of antigen-specific  
48 serum IgG with intramuscular immunization. Based on these results, we conclude that intranasal  
49 administration of Hma or IutA formulated with dmLT adjuvant provides the greatest protection  
50 from UPEC UTI. This study advances our progress toward a vaccine against uncomplicated UTI,  
51 which will significantly improve the quality of life for women burdened by recurrent UTI and  
52 enable better antibiotic stewardship.

53 **Importance (105/150 words)**

54 Urinary tract infections (UTI) are among the most common bacterial infection in humans,  
55 affecting half of all women at least once during their lifetimes. The rise in antibiotic resistance  
56 and health care costs emphasizes the need to develop a vaccine against the most common UTI  
57 pathogen, *Escherichia coli*. Vaccinating mice intranasally with a detoxified heat-labile  
58 enterotoxin and two surface exposed receptors, Hma or IutA, significantly reduced bacterial  
59 burden in the bladder. This work highlights progress in the development of a UTI vaccine  
60 formulated with adjuvants suitable for human use and antigens that encode outer membrane iron  
61 receptors required for infection in the iron-limited urinary tract.

## 62 **Introduction**

63           Urinary tract infections (UTI), the second most common human infection after  
64 respiratory infections, result in an annual cost of \$3.5 billion (1, 2). Uropathogenic *Escherichia*  
65 *coli* (UPEC) is the most prevalent causative agent of uncomplicated UTI, rates of antibiotic  
66 resistance in pathogenic isolates are increasing, and multidrug resistant strains (*E. coli* ST131)  
67 are emerging (1-3). Despite innate immune defenses in the bladder that include micturition, a  
68 mucin layer, constitutively expressed secretory immunoglobulin A, cationic antimicrobial  
69 peptides, Tamm-Horsfall protein, lactoferrin, and lipocalin-2 (4), half of all women will  
70 experience a UTI in their lifetime with 1 in 40 women experiencing recurrent infections (5).  
71 Patients with acute or recurrent UTI have significantly decreased levels of total secretory IgA in  
72 the urine as compared to healthy individuals with no history of UTI (6, 7). This indicates the  
73 potential for decreased severity and duration of infection if microbe-specific antibody levels can  
74 be increased with a vaccine. Because 90% of symptomatic UTI are uncomplicated infections, an  
75 ideal vaccine will target factors critical for establishment of bladder colonization (3) Five FDA-  
76 approved vaccines provide mucosal protection against other pathogens including poliovirus,  
77 rotavirus, influenza virus, *Salmonella enterica* serovar Typhi, and *Vibrio cholerae* (8-11). These  
78 efficacious mucosal vaccines that protect against other enteric viruses and bacteria bolster the  
79 hypothesis that a vaccine effective against uropathogens is attainable.

80           During the last 20 years there have been noteworthy advancements toward the  
81 development of a UTI vaccine, yet no licensed UTI vaccines are available for use in the U.S.  
82 Published studies have investigated the efficacy of vaccines containing O antigen (12), fimbrial  
83 subunits (13, 14),  $\alpha$ -hemolysin (15), siderophores (16), and a variety of outer membrane  
84 siderophore receptors in animal models of UTI (17-20). Human clinical trials have been

85 performed on three vaccines, Uro-Vaxom, SolcoUrovac, and ExPEC4V. Uro-Vaxom,  
86 comprised of 18 *E. coli* uropathogen extracts and administered as a daily oral tablet, is approved  
87 in Germany and Switzerland for the prevention of recurrent cystitis (21). SolcoUrovac, currently  
88 marketed as StroVac, contains heat-killed uropathogenic bacteria including *E. coli*, *Proteus*  
89 *vulgaris*, *Klebsiella pneumoniae*, *Morganella morganii*, and *Enterococcus faecalis* and is  
90 approved for human use in Europe (3, 22). ExPEC4V consists of four conjugated O-antigens  
91 O1A, O2, O6A, and O25B common to *E. coli* strains known to cause UTI (23). In a study  
92 comparing the efficacy of these three vaccines in adults with recurrent UTIs, Uro-Vaxom had the  
93 greatest reduction in rate of UTI recurrence while ExPEC4V did not appear to reduce UTI  
94 recurrence (24). Nonetheless, the daily regimen and toxic side effects have limited widespread  
95 use of Uro-Vaxom (25).

96 Here we describe our efforts to develop a vaccine against uncomplicated UTIs using  
97 antigens previously identified and validated as vaccine candidates by intranasal immunization in  
98 a murine UTI model when conjugated to the adjuvant cholera toxin (26-28). We previously  
99 performed an extensive multi-omics approach to identify genes and their proteins that: 1) are  
100 localized to the bacterial cell surface (29); 2) are expressed during growth in human urine (30),  
101 murine infection (31), and human infection (32, 33); 3) possess immunoreactive properties (34);  
102 and 4) are more prevalent in UPEC isolates than commensal isolates (35, 36). A total of four  $\beta$ -  
103 barrel outer membrane receptors required for iron sequestration met all of these criteria including  
104 heme receptor Hma, aerobactin receptor IutA, yersiniabactin receptor FyuA, and putative  
105 siderophore receptor IreA. Effective iron acquisition from the iron-limited environment of the  
106 urinary tract is required for full virulence of UPEC (37-39). In addition to their iron scavenging  
107 function, IreA functions as an adhesin that is important for colonization of the bladder (38) and

108 FyuA plays a role in biofilm formation in human urine (40). Intranasal immunization with Hma,  
109 IreA, IutA, or FyuA, conjugated to cholera toxin, significantly reduced in bacterial burden in the  
110 bladder, kidneys or both 48 hours following transurethral challenge with UPEC (27, 28). While  
111 cholera toxin is an effective immune stimulant in mice, it is not suitable for human use, due to  
112 development of profuse diarrhea with oral doses as low as 5 µg (41). Because of this drawback,  
113 we sought to optimize this UTI vaccine by incorporating adjuvants approved for use in humans  
114 or used in vaccine clinical trials.

115         The precise immune response required for protection against UTI is not well-defined.  
116 Therefore, we selected a panel of adjuvants known to elicit an array of adaptive immune  
117 responses, with the aim being to identify an adjuvant that is well-suited for protecting against  
118 UTI and safe for use in humans (3, 42). The five adjuvants tested were alum (43, 44),  
119 monophosphoryl lipid A (MPLA) (45-47), unmethylated CpG synthetic oligodeoxynucleotides  
120 (CpG) (48-50), polyinosinic:polycytidylic acid (polyIC) (51), and double mutant  
121 (R192G/L211A) heat-labile *E. coli* enterotoxin (dmLT) (52). Alum is licensed for use in twenty-  
122 two vaccines available in the U.S. and is reported to activate dendritic cells via multiple  
123 mechanisms, thus promoting antigen uptake and release of IL-1β and IL-18 (43, 53). MPLA is  
124 derived from *Salmonella minnesota* R595 lipopolysaccharide, activates cellular immunity  
125 through the TLR4 signaling pathway, is approved for human use in Europe, and is a component  
126 of vaccines for hepatitis B and papilloma viruses (51, 54). CpG activates TLR9 signaling in B  
127 cells and dendritic cells, increases mucosal immune responses, and is licensed for use in a  
128 hepatitis B vaccine (46, 47, 55). Both dmLT and CpG are presumed to function by activating  
129 innate signaling and stimulation of mucosal dendritic cells, which activate the adaptive immune  
130 response, particularly Th17 cells by dmLT (52, 56-58). polyIC is a synthetically produced

131 double stranded RNA, analogous to viral RNA, that induces a robust type I interferon response  
132 resulting in activation of cellular immunity, and is in late stage clinical development (51).

133         In an effort to develop a vaccine protective against uncomplicated UTI in humans, we  
134 tested five adjuvants (dmLT, CpG, polyIC, MPLA, and alum) with four antigens (Hma, IreA,  
135 IutA, or FyuA) for efficacy in mice. Because immunization route can affect the immune  
136 response, we examined three routes of immunization: intranasal, intramuscular, and  
137 subcutaneous with multiple antigen-adjuvant combinations. Hma and IreA, which have been  
138 shown to significantly reduce previously demonstrated to provide the most robust reduction of  
139 bacterial burden in the kidneys and bladder (28), respectively, were initially examined under all  
140 conditions, then the most promising combinations of route and adjuvant were further evaluated  
141 for efficacy with the remaining two antigens FyuA and IutA. Here we report that intranasal  
142 immunization with dmLT-Hma and dmLT-IutA induces antigen-specific antibody production  
143 and provides robust protection in immunized mice following transurethral challenge with UPEC.

144

## 145 **Results**

146 **Immunizing via the intranasal route provides the most protection against UTI.** We  
147 previously established that intranasal immunization followed by two weekly boosts with outer  
148 membrane iron receptors Hma, IreA, IutA or FyuA conjugated to cholera toxin significantly  
149 reduced bacterial burden in the bladder, kidneys or both, 48 hours following transurethral  
150 challenge with UPEC (27, 28). We later determined that conjugation of antigen to adjuvant was  
151 not required for protection (unpublished results). Based on these data, we began systematic  
152 optimization of the vaccine to maximize efficacy using alternative adjuvants admixed with  
153 antigen. The optimized vaccine route, adjuvant and antigen were evaluated based on three  
154 criteria: reduction of bacterial CFU in the sample sites, increased number of mice without  
155 detectable bacterial counts, and production of antigen-specific antibody. Genes encoding all  
156 protein antigens were codon-optimized, proteins were purified from inclusion bodies and  
157 certified LPS-free.

158 The immunization route can markedly affect the efficacy of vaccines, and some routes  
159 are linked to greater patient compliance especially when immunization requires multiple boosts  
160 (59, 60). In an effort to determine the optimal route, we systematically immunized mice with one  
161 of five adjuvants either intranasally, intramuscularly, or subcutaneously in combination with  
162 either Hma or IreA, which have been shown to significantly reduce bacterial burden in the  
163 kidneys and bladder, respectively (28). Promising combinations of route and adjuvant were  
164 further evaluated for efficacy by immunizing with the remaining two antigens FyuA and IutA.  
165 Intramuscular and subcutaneous routes were chosen to expand upon early success with intranasal  
166 immunization because they are commonly used deliver vaccines in humans. Mice were



167 immunized as previously described (28). In total, 35 immunization trials utilizing 1,060 mice  
168 were performed.

169 We found that intranasal immunization tended to reduce median bacterial burden at least  
170 two-fold in the urine for all antigen-adjuvant combinations tested (Table 1). When immunized  
171 intranasally, two-fold reduction in median bacterial burden in the bladder occurred for 58%  
172 (7/12) of combinations tested and in the kidneys for 33% (4/12) of combinations tested (Table 1).  
173 Significant differences are noted in bold in Table 1. Specifically, intranasal immunization with  
174 polyIC-IutA ( $P=0.059$  urine), dmLT-Hma ( $P=0.024$  bladder), dmLT-IutA ( $P=0.018$  bladder) and  
175 CpG-IutA ( $P=0.046$  kidneys) significantly reduced bacterial burden (Figure 1B, E, F, J, Table 1).  
176 Three adjuvant-antigen combinations tended to reduce colony forming units (CFU) more than  
177 two-fold in all sites of infection following intranasal immunization: dmLT-IutA, CpG- Hma, and  
178 CpG-IreA (Table 1). The bimodal distribution of bladder colonization observed with protective  
179 combinations (dmLT-Hma, dmLT-IutA) is typical of this model (19, 20).

180 Immunization via the intramuscular and subcutaneous routes showed limited protection.  
181 Intramuscular immunization utilizing Hma as antigen tended to reduce median bacterial burden  
182 at least two-fold in 3 out of 12 trials (Table 1). Immunization with IreA intramuscularly did not  
183 reduce bacterial burden two-fold or greater in any trial. The subcutaneous route in combination  
184 with Hma tended to reduce median CFU at least two-fold in the urine when formulated with  
185 alum or dmLT, and in the kidneys when formulated with MPLA (Table 1). No reduction in  
186 bacterial burden was observed for any of the sites of infection when any of the IreA vaccine  
187 formulations were administered subcutaneously (Table 1).

188 Bacterial inocula for the thirty-five infection trials were confirmed to be at the desired  
189 dose with the median dose at  $3.05 \pm 0.11 \times 10^9$  CFU/mL of strain CFT073 and  $2.70 \pm 0.20 \times 10^9$

190 CFU/mL of strain 536 (Supplemental Figure 1). Strain CFT073 lacks a functional FyuA,  
191 therefore vaccine combinations containing this antigen utilized *E. coli* strain 536 for challenge.  
192 These data verify that variances in colonization level between the experimental trials were not  
193 due to differences in bacterial dose used to transurethraly inoculate mice (Supplemental Figure  
194 1). When polyIC or CpG was administered intranasally in the absence of antigen, the median  
195 colonization level of CFT073 was not significantly different from that of unimmunized mice  
196 infected with the same dose of CFT073 (Supplemental Figure 2), indicating that polyIC or CpG  
197 alone do not alter colonization of CFT073. However, intranasal administration of dmLT as  
198 adjuvant in the absence of antigen significantly reduced the bacterial burden in the kidneys  
199 ( $P=0.02$ ) (Supplemental Figure 2), consistent with previous findings that dmLT alone reduced  
200 colonization of multiple pathogens including *Haemophilis influenzae*, *Campylobacter jejuni*, and  
201 *Shigella flexneri* (52).

202 Taken together these results indicate that intranasal immunization tended to improve the  
203 protective response in the urine, bladder and kidneys at least two fold following bacterial  
204 challenge for 64% (23/36) of the adjuvant-antigen combinations, five of these were statistically  
205 significant, in comparison to intramuscular immunization 33% (8/24,  $P = 0.03$ ) or subcutaneous  
206 immunization 13% (3/24,  $P < 0.005$ ) (Table 1). No statistically significant CFU reductions were  
207 observed in any combination administered by the intramuscular or subcutaneous routes.  
208 Therefore, intranasal immunization is the optimal route for protection against transurethral  
209 challenge with *E. coli*.

210 **dmLT is the adjuvant that provides the most effective protection against**  
211 **colonization by *E. coli*.** Having determined that intranasally administering different vaccine  
212 formulations provides the most consistent protection against UTI, we next set out to optimize the

213 adjuvant. Previous studies have shown that immunizing with cholera toxin conjugated to  
214 antigens provides a robust immune response and reduces bacterial burden in the bladder and  
215 kidneys of CBA/J mice (27, 28), however, it is not suitable for human use (41). In an effort to  
216 develop a vaccine to prevent UTI, we tested our antigen candidates admixed with alternative  
217 adjuvants approved for human immunization: dmLT, CpG, polyIC, MPLA, and alum, for  
218 efficacy in mice. Intranasal immunization with dmLT, an adjuvant very similar in structure to  
219 cholera toxin (both are A<sub>1</sub>B<sub>5</sub> toxins), significantly reduced the median bladder colonization ( $P =$   
220 0.02) when admixed with the antigen Hma compared to dmLT alone (Figure 1E). In addition,  
221 this vaccine combination significantly increased the number of mice without detectable bacteria  
222 in the bladder (35% dmLT only, 68% dmLT-Hma,  $P = 0.056$ ), and urine (26% dmLT only, 61%  
223 dmLT-Hma,  $P = 0.05$ ) indicating that more mice cleared the infection (below the limit of  
224 detection) 48 hours post-inoculation (Supplemental Table 1). Similar to Hma, immunizing with  
225 dmLT-IutA significantly reduced the median CFU/g bladder ( $P = 0.02$ ) (Figure 1F) and  
226 significantly increased the number of protected mice (20% dmLT only, 67% dmLT-IutA,  $P =$   
227 0.03) (Supplemental Table 1). In addition, dmLT administered with FyuA and IutA tended to  
228 reduce urine bacterial load two-fold (Table 1).

229         Other adjuvant-antigen combinations that resulted in significant reductions in bacterial  
230 burden when administered intranasally include polyIC-IutA ( $P = 0.05$  urine) (Figure 1B) and  
231 CpG-IutA ( $P = 0.05$  kidneys) (Figure 1J). The primary target of this vaccine is patients with  
232 uncomplicated UTI, therefore, reducing bladder colonization and inflammation (cystitis) is the  
233 desired outcome. Since dmLT-IutA and dmLT-Hma both reduced bacterial burdens in the  
234 bladder, dmLT was selected for future studies.

235           **IutA is the optimal antigen when co-administered with dmLT via the intranasal**  
236 **route.** Previous studies with cholera toxin conjugated to antigens found that IreA and IutA  
237 provided significant protection from bacterial challenge in the bladder and Hma, FyuA, and IutA  
238 provided protection in the kidneys (27, 28). When administered via the intranasal route and  
239 formulated with dmLT, individually all four antigens trended toward reducing bacterial burdens  
240 in the urine (Figure 1A-D). In the bladder, CFU/g tissue was significantly reduced compared to  
241 adjuvant alone when Hma (32 fold-reduction,  $P=0.024$ ) and IutA (86 fold-reduction,  $P=0.018$ )  
242 were co-administered with dmLT (Figure 1E, F). FyuA and IreA did not provide any protection  
243 compared to the adjuvant alone cohort (Table 1, Figure 1G, H). IutA was the only antigen that  
244 reduced colonization more than two-fold in the kidneys, although this reduction was not  
245 statistically significant (Table 1). According to these results, IutA is an effective antigen for  
246 reduction of bacterial burden when administered via the intranasal route in combination with  
247 dmLT in all sites of infection. In comparison Hma is an effective antigen in two sites of  
248 infection.

249           **Antigen-specific antibody response to immunization.** In addition to evaluating the  
250 vaccine efficacy by observing changes in the bacterial burden after challenge, the humoral  
251 response was evaluated using an indirect ELISA. The amount of antigen-specific IgG in serum  
252 collected one week after the second boost was quantified. In all trials, independent of route,  
253 adjuvant or antigen, mice immunized with adjuvant alone had no measurable amounts of  
254 antigen-specific antibody (Figure 2, 3 Supplemental Figure 3). However, mice immunized with  
255 adjuvant admixed with antigen elicited a statistically significant increase in the concentration of  
256 antigen-specific IgG in the serum compared to controls immunized with adjuvant alone ( $P =$   
257  $0.05$ ) (Figure 2, 3 Supplemental Figure 3). This indicated that addition of adjuvant alone does

258 not produce an antigen-specific immune response, and outer-membrane iron receptor  
259 preparations containing no LPS contamination are antigenic.

260         The immune responses generated between routes of immunization and adjuvants varied.  
261 Intranasal immunization with dmLT generated the most consistent and robust serum antibody  
262 response across all antigens, with median concentration of antigen-specific IgG 12.0 µg/mL  
263 Hma, 21.6 µg/mL IreA, 5.8 µg/mL FyuA, 22.4 µg/mL IutA (Figure 2A). When compared to  
264 vaccine formulations that significantly reduced bacterial burden in the bladder of challenged  
265 mice, there was no correlation between antigen-specific antibody production and protection for  
266 individual mice, indicating that the mechanism of protection may include cell-mediated  
267 immunity (Supplemental Figure 4). In comparison to immunizations with dmLT, polyIC in  
268 combination with all antigens produced a weak antigen-specific antibody response with an  
269 average concentration of 3.2 µg/mL serum IgG (Figure 2B). When all intranasal immunizations  
270 are compared, mice immunized intranasally with CpG-IutA produced the greatest median  
271 concentration of antigen-specific antibody of all intranasal immunizations (44.9 µg/mL),  
272 although the response was highly variable between individual mice (Figure 2C) and did not  
273 correlate with a reduction in bladder bacterial burden (Supplemental Figure 3D).

274         Although intramuscular and subcutaneous immunization were less effective at reducing  
275 the bacterial burden in the urine, bladder and kidneys of challenged mice, these routes were able  
276 to generate an antigen-specific IgG response in the serum (Figure 3, Supplemental Figure 3).  
277 Intramuscular immunizations with MPLA produced the highest median concentration of antigen-  
278 specific antibody for all vaccine trials (median Hma 54.1 µg/mL, IreA 96.0 µg/mL) (Figure 3D),  
279 with vaccine combinations that used alum as adjuvant producing similar responses (Figure 3C).  
280 Immunizations performed with dmLT as adjuvant had a very weak IgG response when

281 administered intramuscularly (median Hma 5.7  $\mu\text{g}/\text{mL}$ , IreA 8.3  $\mu\text{g}/\text{mL}$ ) (Figure 3A).  
282 Subcutaneous immunizations produced a similar antigen-specific IgG response independent of  
283 adjuvant, mean concentrations in pooled mouse sera ranging from 37.8  $\mu\text{g}/\text{mL}$  to 97.3  $\mu\text{g}/\text{mL}$   
284 (Supplemental Figure 3). Most notably, for both the intramuscular and subcutaneous routes,  
285 immunization of mice with IreA increased the concentration of antigen-specific antibody above  
286 similar vaccine formulations where Hma was used as antigen (Figure 3, Supplemental Figure 3),  
287 indicating that IreA may be more antigenic despite having a highly similar tertiary structure.

## 288 **Discussion**

289           Currently, there is no licensed vaccine in the U.S to prevent UTI by *E. coli*. In this  
290 current era of increasing antibiotic resistance, developing preventive measures against urinary  
291 tract pathogens, especially UPEC, is critical. Towards that goal, here we have systematically  
292 tested four antigens, previously validated for their protective efficacy against colonization of the  
293 bladder and kidneys during experimental murine UTI (27, 28) in combination with each of five  
294 adjuvants, compatible with eventual clinical trial design, delivered by each of three routes.  
295 Intranasal immunization was previously protective in mice, while intramuscular or subcutaneous  
296 routes are more commonly used in humans. Intranasal administration of dmLT formulated with  
297 Hma or IutA significantly reduced bladder CFU and significantly increased the number of mice  
298 without detectable CFU. Immunization with dmLT which, like cholera toxin, is an A<sub>1</sub>B<sub>5</sub> toxin,  
299 consistently generated a robust IgG antibody response against the administered antigen.  
300 Optimization of the route, adjuvant and antigen is an important step in development of a UTI  
301 vaccine for human clinical trials.

302           Induction of mucosal immune responses is most efficiently stimulated by delivery of a  
303 vaccine at a mucosal surface (61) and may be due to the common mucosal immune system that  
304 links tissues of the lung, gastrointestinal tract, urogenital tract, and nasopharynx (62). In mice,  
305 monkeys, and humans, vaccines administered intranasally generate mucosal immune responses  
306 in the female genital tract (63-66). This is attributed to the expression of redundant B and T cell  
307 homing receptors (CCR10, CCL28 and  $\alpha_4\beta_7$ -integrin) throughout mucosal surfaces, allowing  
308 circulating activated B and T cells to be attracted to multiple mucosal sites (67). Here we have  
309 shown that intranasal immunization is more effective at reducing bacterial CFU in the bladder of  
310 mice. Intramuscular and subcutaneous routes of vaccination may be less effective because

311 homing receptors are not expressed on B cells that are activated in peripheral lymph nodes (68).  
312 However, it has been shown that subcutaneous immunization performed with two weeks  
313 between boosts can significantly reduce kidney colonization and generate serum IgG in Balb/c  
314 mice when formulated with MPLA-FimH/MrpH (69), alum-FyuA (18) and adjuvant-IroN (17).

315         When administered intranasally, the adjuvant dmLT significantly reduced colonization of  
316 UPEC in the bladder during UTI. Other adjuvants were unable to produce equivalent results,  
317 independent of administration route. The success of dmLT recapitulates previous findings in  
318 experiments testing antigenicity of outer membrane iron receptors that utilized cholera toxin  
319 conjugated to antigens (27, 28). This is likely related to the similarity between the two toxins.  
320 Both are A<sub>1</sub>B<sub>5</sub> toxins whose B subunits bind to ganglioside GM1 and facilitate endocytosis of the  
321 A subunit into the cytosol (70-72). In addition, we found that dmLT alone reduced colonization  
322 in the kidneys, consistent with other vaccines where dmLT was used as adjuvant (52). The  
323 mechanism of immune modulation for dmLT has been demonstrated to be a strong IL-17  
324 response and activation of Th17 cells (52, 73), which may contribute to its success given the  
325 critical role of Th17 cells and IL-17 signaling during the host response to bladder infection (4,  
326 28, 74).

327         The four antigens used to determine the optimal route and adjuvant for a urinary tract  
328 vaccine have similar cellular functions. These proteins display similar  $\beta$ -barrel structures, are  
329 located in the Gram-negative bacterial outer membrane, and mediate the uptake of siderophores  
330 (FyuA, IutA, and IreA) or heme molecules (Hma) from the extracellular environment. However,  
331 despite these similarities, there are marked differences in the host response when individually  
332 formulated with a single adjuvant. IutA was the only antigen to significantly reduce bacterial  
333 colonization in all sites of infection assessed. In addition, intranasal immunization with IutA



334 produced the most robust serum IgG response independent of adjuvant. This could be due to the  
335 high percentage of its amino acid sequence likely to represent MHC class II epitopes predicted  
336 by BepiPred-2.0, when compared to Hma, IreA, and FyuA. Furthermore, IutA has been shown to  
337 be highly expressed in the mouse model of ascending UTI, as assessed by RNA microarray, and  
338 in women presenting with symptoms of cystitis (32, 75, 76). Indeed, RNAseq data from 14  
339 different strains, stabilized immediately following urine collection, clearly demonstrated that  
340 *iutA*, *hma*, *fyuA*, and *ireA*, are highly expressed *in vivo* in women with acute cystitis (77). Based  
341 on its efficacy and antigenicity, IutA should be considered for inclusion in future UTI vaccines,  
342 particularly those aimed at increasing the breadth of protection against UPEC strains and  
343 overcoming the functional redundancy of iron receptors by incorporation of multiple antigens.

344         Traditional vaccine development has been focused on production of antibodies and  
345 immunological memory. Our intranasally administered vaccine using the adjuvant dmLT  
346 significantly reduces *E. coli* colonization of the murine bladder when formulated with Hma or  
347 IutA; however, serum antigen-specific antibody levels did not correlate with CFU in the current  
348 study using purified LPS-free proteins. These results could suggest that administration of  
349 adjuvants via our tested routes did not elicit an effective antibody response, and that cellular  
350 immunity may be involved in protection. To that point, we previously demonstrated that  
351 intranasal immunization with bacterial siderophores (yersiniabactin and aerobactin), that bind to  
352 our iron-receptor antigens, provides protection by an unknown non-antibody-mediated  
353 mechanism (16). In addition, experiments vaccinating mice with cholera toxin conjugated to  
354 outer-membrane iron receptors generated antigen-specific antibody universally, independent of  
355 any observed reduction in CFU during murine ascending UTI (28). Together these data suggest  
356 that a strong IgG antibody response is not indicative of protection against infection. Further

357 work is required to identify the immune factors contributing to protection, which will  
358 accelerate the development of an effective human UTI vaccine.

## 359 **Materials and Methods**

### 360 **Ethics statement.**

361 **Animal protocols.** All animal protocols were approved by the Institutional Animal Care  
362 and Use Committee (IACUC) at the University of Michigan Medical School (PRO00009173),  
363 and in accordance with the Office of Laboratory Animal Welfare (OLAW), the United States  
364 Department of Agriculture (USDA), and the guidelines specified by the Association for  
365 Assessment and Accreditation of Laboratory Animal Care, International (AAALAC, Intl.). Mice  
366 were anesthetized with a weight-appropriate dose (0.1 mL for a mouse weighing 20 g) of  
367 ketamine/xylazine (80-120 mg/kg ketamine and 5-10 mg/kg xylazine) by intraperitoneal  
368 injection. Mice were euthanized by inhalant anesthetic overdose followed by vital organ  
369 removal.

370

371 **Bacterial strains and culture conditions.** *E. coli* CFT073 was isolated from the blood and urine  
372 of a hospitalized patient with acute pyelonephritis and urosepsis (78) and *E. coli* 536 was isolated  
373 from a patient with pyelonephritis (79). Transurethral infections with CFT073 or 536 were  
374 performed in mice immunized with vaccine formulations containing Hma, IreA, IutA, or FyuA.  
375 *E. coli* CFT073 does not encode a functional FyuA protein, thus, strain 536 was used to  
376 challenge mice that were immunized with FyuA. Strains were cultured in lysogeny broth (LB: 10  
377 g/L tryptone, 5 g/L yeast extract, 0.5 g/L NaCl) at 37°C with aeration until saturation or on LB  
378 agar at 37°C.

379

380 **Antigen purification and concentration.** Commercially produced purified antigens were  
381 supplied by GenScript as follows. DNA sequences of *hma*, *ireA*, *iutA* from *E. coli* CFT073 and

382 *fyuA* from *E. coli* 536 were codon-optimized and individually synthesized in-frame with a 6X  
383 histidine affinity tag and subcloned into *E. coli* expression vector pET-30a. Recombinant  
384 plasmids were transformed into *E. coli* BL21 star (DE3), cultured with shaking at 37°C in TB  
385 medium containing kanamycin, induced with IPTG, and harvested by centrifugation at 8,000  
386 rpm. Cell pellets were lysed by sonication. Following centrifugation at 13,000 rpm, the  
387 precipitate was dissolved using 8M urea. Target protein was filter sterilized using a 0.22 µm  
388 membrane, quantified by the Bradford protein assay, and protein purity was determined by SDS-  
389 PAGE and Western Blot. Purified protein was obtained from inclusion bodies with purity  
390 varying from 85-90%. Proteins were certified as being endotoxin-free with levels < 100 EU/mg.  
391 Prior to immunization and subsequent boosts protein was concentrated with 10,000 NMWL  
392 centrifugal filter units (EMD Millipore).

393

394 **Vaccine formulation and administration.** Formulation of vaccines by mixing antigen and  
395 adjuvant was performed on the day of primary immunization and on the day of each subsequent  
396 boost. For each trial, seven to eight-week old CBA/J mice are given a primary dose of adjuvant  
397 alone, or adjuvant combined with 100 µg purified, LPS-free antigen via the specified route,  
398 intramuscular (IM), subcutaneous (SQ), or intranasal (IN), on day 0. On days 7 and 14, mice are  
399 boosted with adjuvant alone, or adjuvant combined with 25 µg antigen by the same route. On  
400 day 21 blood is collected retro orbitally via capillary tube, and mice are transurethrally  
401 inoculated with a UPEC strain expressing the antigen of interest. Forty-eight hours post  
402 inoculation urine is collected via abdominal massage and mice are sacrificed. Bladder and  
403 kidneys are harvested and bacterial burden per mL urine or per gram tissue determined. Amount  
404 and concentration of adjuvant for each vaccine was based upon pre-determined values as noted

405 in product specification sheets and in published studies (80-83). A total of five adjuvants were  
406 tested for their efficacy within the vaccine formulations: Aluminum hydroxide gel (alum)  
407 (Alhydrogel adjuvant 2%, InvivoGen), Polyinosinic-polycytidylic acid (poly (I:C) HMW)  
408 (InvivoGen), Monophosphoryl Lipid A from *Salmonella minnesota* R595 (MPLA-SM)  
409 (InvivoGen), unmethylated CpG synthetic oligodeoxynucleotides ODN 2395, type C (CpG)  
410 (InvivoGen), and double mutant heat-labile toxin 1LT(R192G/L211A) (dmLT) (provided by Dr.  
411 John D Clements and Dr. Elizabeth Norton; Tulane University School of Medicine) (84). See  
412 Supplemental Table 2 for dose of adjuvant administered for each immunization route. For each  
413 vaccine trial, a control vaccine formulation was prepared containing adjuvant alone and  
414 phosphate buffered saline (PBS) with 1mM ethylenediamine tetraacetic acid (EDTA). Prepared  
415 antigen formulations were administered to seven to eight-week old female CBA/J mice IN (20  
416  $\mu\text{L}/\text{mouse}$ , 10  $\mu\text{L}/\text{nare}$ ), IM (50  $\mu\text{L}/\text{mouse}$ ) or SQ (70  $\mu\text{L}/\text{mouse}$ ).

417

418 **Murine model of ascending UTI.** Female CBA/J mice were transurethrally challenged as  
419 previously described (85). Briefly, bacterial pellets were harvested with centrifugation (3000 x g,  
420 30 min, 4°C) and resuspended in phosphate-buffered saline (PBS: 8 g/L NaCl, 0.2 g/L KCl, 1.44  
421 g/L  $\text{Na}_2\text{HPO}_4$ , 0.24 g/L  $\text{KH}_2\text{PO}_4$ , pH 7.4) to a final dose of  $2 \times 10^9$  CFU/mL. Actual inocula for  
422 each experimental trial are compared in Supplemental Figure 1. Each mouse was anesthetized  
423 and transurethrally infected with 50  $\mu\text{L}$  of bacterial suspension using a Harvard Apparatus with a  
424 flow rate of 100  $\mu\text{L}/\text{min}$ . Forty-eight hours post inoculation blood and urine were collected,  
425 mice were euthanized and bladder and kidneys were harvested. Urine and organ homogenates  
426 were diluted, plated on LB agar using an Autoplate 4000 spiral plater (Spiral Biotech) and

427 enumerated using a QCount automated plate counter (Spiral Biotech) to determine the CFU/mL  
428 urine or CFU/g tissue.

429

430 **Antibody quantification by ELISA.** Quantification of antigen-specific antibody concentrations  
431 via indirect enzyme-linked immunosorbent assay (ELISA) was performed as previously  
432 described (27). Briefly, 5 µg/mL purified protein diluted in bicarbonate/carbonate buffer (3.03  
433 g/L Na<sub>2</sub>CO<sub>3</sub>, 6.0 g/L NaHCO<sub>3</sub>) was coated in each well and incubated at 4°C overnight. Plates  
434 were washed with PBST (PBS containing 0.05% Tween 20) using an ELx405 microplate washer  
435 (Bio-Tek Instruments, Inc.) and blocked with SuperBlock (Pierce). Following a second wash in  
436 PBST, 50 µL of sera diluted in SuperBlock or undiluted urine were added to wells and incubated  
437 for 1-2 h at room temperature. Plates were again washed with PBST and coated with 50 µL  
438 1:10,000 diluted secondary antibody goat anti-mouse IgG HRP conjugated (1030-05,  
439 SouthernBiotech) and incubated 1 hr at room temperature. After a final wash in PBST, 50 µL 1-  
440 Step Ultra TMB (3,3',5,5'-tetramethylbenzidine) (Thermo Scientific) was added to each well and  
441 incubated at room temperature until sufficient color had developed. To stop the reaction, 50 µL  
442 2M sulfuric acid was added to each well and the absorbance at 450 nm was read with a µQuant  
443 plate reader (Bio-Tek Instruments, Inc.). Antibody concentration was determined by comparing  
444 absorbance values to known concentrations of mouse IgG (0107-01, SouthernBiotech) bound to  
445 the plate with goat anti-mouse Ig (1010-01, SouthernBiotech). Serum assays were performed in  
446 duplicate for each mouse.

447

448 **Statistical analysis.** All graphic images and statistics were generated with Prism version 7  
449 (GraphPad Software, Inc.). Significant differences in colonization levels and number of mice  
450 without detectable CFU were determined by a two tailed Mann-Whitney test, and Fisher's exact  
451 test, respectively. Correlations between antibody concentrations and bacterial burden were  
452 determined by Pearson correlation coefficient.

### 453 **Funding Information**

454 This work was supported by the Public Health Service grant AI116791 from the National  
455 Institutes of Health to HLT Mobley. The content may not represent the official views of the  
456 National Institutes of Health.

457

### 458 **Acknowledgements**

459 We would like to thank all members of the Mobley laboratory for their insightful  
460 comments and helpful critiques. We would also like to acknowledge Dr. John D. Clements and  
461 Dr. Elizabeth Norton for the gift of dmLT.

## 462 Literature Cited

- 463 1. Dielubanza EJ, Schaeffer AJ. 2011. Urinary Tract Infections in Women. *Medical Clinics*  
464 of North America 95:27-41.
- 465 2. Sivick KE, Mobley HLT. 2010. Waging war against uropathogenic *Escherichia coli*:  
466 winning back the urinary tract. *Infection and immunity* 78:568-585.
- 467 3. O'Brien VP, Hannan TJ, Nielsen HV, Hultgren SJ. 2016. Drug and Vaccine Development  
468 for the Treatment and Prevention of Urinary Tract Infections. *Microbiology spectrum*  
469 4:10.1128/microbiolspec.UTI-0013-2012.
- 470 4. Ingersoll MA, Albert ML. 2013. From infection to immunotherapy: host immune  
471 responses to bacteria at the bladder mucosa. *Mucosal Immunology* 6:1041.
- 472 5. Foxman B, Brown P. 2003. Epidemiology of urinary tract infections: Transmission and  
473 risk factors, incidence, and costs. *Infectious Disease Clinics of North America* 17:227-  
474 241.
- 475 6. Svanborg-Eden C, Svennerholm AM. 1978. Secretory immunoglobulin A and G  
476 antibodies prevent adhesion of *Escherichia coli* to human urinary tract epithelial cells.  
477 *Infect Immun* 22:790-7.
- 478 7. Riedasch G, Heck P, Rauterberg E, Ritz E. 1983. Does low urinary sIgA predispose to  
479 urinary tract infection? *Kidney Int* 23:759-63.
- 480 8. Modlin JF. 2004. Poliomyelitis in the United States: the final chapter? *Jama* 292:1749-51.
- 481 9. Kapikian AZ, Hoshino Y, Chanock RM, Perez-Schael I. 1996. Efficacy of a quadrivalent  
482 rhesus rotavirus-based human rotavirus vaccine aimed at preventing severe rotavirus  
483 diarrhea in infants and young children. *J Infect Dis* 174 Suppl 1:S65-72.
- 484 10. Belshe RB, Mendelman PM, Treanor J, King J, Gruber WC, Piedra P, Bernstein DI,  
485 Hayden FG, Kotloff K, Zangwill K, Iacuzio D, Wolff M. 1998. The efficacy of live  
486 attenuated, cold-adapted, trivalent, intranasal influenza virus vaccine in children. *N Engl J*  
487 *Med* 338:1405-12.
- 488 11. Levine MM. 2000. Immunization against bacterial diseases of the intestine. *J Pediatr*  
489 *Gastroenterol Nutr* 31:336-55.
- 490 12. Uehling DT, Wolf L. 1969. Enhancement of the bladder defense mechanism by  
491 immunization. *Investigative urology* 6:520-526.
- 492 13. Langermann S, Möllby R, Burlein JE, Palaszynski SR, Gale Auguste C, DeFusco A,  
493 Strouse R, Schenerman MA, Hultgren SJ, Pinkner JS, Winberg J, Guldevall L, Söderhäll  
494 M, Ishikawa K, Normark S, Koenig S. 2000. Vaccination with FimH Adhesin Protects  
495 *Cynomolgus* Monkeys from Colonization and Infection by Uropathogenic *Escherichia*  
496 *coli*. *The Journal of Infectious Diseases* 181:774-778.
- 497 14. Roberts JA, Kaack MB, Baskin G, Chapman MR, Hunstad DA, Pinkner JS, Hultgren SJ.  
498 2004. Antibody Responses and Protection From Pyelonephritis Following Vaccination  
499 With Purified *Escherichia coli* PapDG Protein. *Journal of Urology* 171:1682-1685.
- 500 15. O'Hanley P, Lalonde G, Ji G. 1991. Alpha-hemolysin contributes to the pathogenicity of  
501 piliated digalactoside-binding *Escherichia coli* in the kidney: efficacy of an alpha-  
502 hemolysin vaccine in preventing renal injury in the BALB/c mouse model of  
503 pyelonephritis. *Infection and Immunity* 59:1153-1161.
- 504 16. Mike LA, Smith SN, Sumner CA, Eaton KA, Mobley HLT. 2016. Siderophore vaccine  
505 conjugates protect against uropathogenic *Escherichia coli* urinary tract infection.



- 506 Proceedings of the National Academy of Sciences of the United States of America  
507 113:13468-13473.
- 508 17. Russo TA, McFadden CD, Carlino-MacDonald UB, Beanan JM, Olson R, Wilding GE.  
509 2003. The Siderophore Receptor *IroN* of Extraintestinal Pathogenic *Escherichia coli* Is a  
510 Potential Vaccine Candidate. *Infection and Immunity* 71:7164-7169.
- 511 18. Habibi M, Asadi Karam MR, Bouzari S. 2017. Evaluation of prevalence, immunogenicity  
512 and efficacy of FyuA iron receptor in uropathogenic *Escherichia coli* isolates as a  
513 vaccine target against urinary tract infection. *Microbial Pathogenesis* 110:477-483.
- 514 19. Alteri CJ, Hagan EC, Sivick KE, Smith SN, Mobley HLT. 2009. Mucosal Immunization  
515 with Iron Receptor Antigens Protects against Urinary Tract Infection. *PLOS Pathogens*  
516 5:e1000586.
- 517 20. Brumbaugh AR, Smith SN, Mobley HLT. 2013. Immunization with the yersiniabactin  
518 receptor, FyuA, protects against pyelonephritis in a murine model of urinary tract  
519 infection. *Infection and immunity* 81:3309-3316.
- 520 21. Cruz F, Dambros M, Naber KG, Bauer HW, Cozma G. 2009. Recurrent Urinary Tract  
521 Infections: Uro-Vaxom®, a New Alternative. *European Urology Supplements* 8:762-768.
- 522 22. Uehling DT, Hopkins WJ, Balish E, Xing Y, Heisey DM. 1997. Vaginal Mucosal  
523 Immunization for Recurrent Urinary Tract Infection: Phase II Clinical Trial. *The Journal*  
524 *of Urology* 157:2049-2052.
- 525 23. Huttner A, Hatz C, van den Dobbelen G, Abbanat D, Hornacek A, Frölich R, Dreyer  
526 AM, Martin P, Davies T, Fae K, van den Nieuwenhof I, Thoelen S, de Vallière S, Kuhn  
527 A, Bernasconi E, Viereck V, Kavvadias T, Kling K, Ryu G, Hülber T, Gröger S, Scheiner  
528 D, Alaimo C, Harbarth S, Poolman J, Fonck VG. 2017. Safety, immunogenicity, and  
529 preliminary clinical efficacy of a vaccine against extraintestinal pathogenic *Escherichia*  
530 *coli* in women with a history of recurrent urinary tract infection: a randomised, single-  
531 blind, placebo-controlled phase 1b trial. *The Lancet Infectious Diseases* 17:528-537.
- 532 24. Aziminia N, Hadjipavlou M, Philippou Y, Pandian SS, Malde S, Hammadeh MY. 2019.  
533 Vaccines for the prevention of recurrent urinary tract infections: a systematic review.  
534 *BJU International* 123:753-768.
- 535 25. Tammen H. 1990. Immunobiotherapy with Uro-Vaxom in Recurrent Urinary Tract  
536 Infection. *British Journal of Urology* 65:6-9.
- 537 26. Mobley LH, Alteri JC. 2016. Development of a Vaccine against *Escherichia coli* Urinary  
538 Tract Infections. *Pathogens* 5.
- 539 27. Brumbaugh AR, Smith SN, Mobley HL. 2013. Immunization with the yersiniabactin  
540 receptor, FyuA, protects against pyelonephritis in a murine model of urinary tract  
541 infection. *Infect Immun* 81:3309-16.
- 542 28. Alteri CJ, Hagan EC, Sivick KE, Smith SN, Mobley HL. 2009. Mucosal immunization  
543 with iron receptor antigens protects against urinary tract infection. *PLoS Pathogens*  
544 5:e1000586.
- 545 29. Walters MS, Mobley HL. 2009. Identification of uropathogenic *Escherichia coli* surface  
546 proteins by shotgun proteomics. *J Microbiol Methods* 78:131-5.
- 547 30. Alteri CJ, Mobley HL. 2007. Quantitative profile of the uropathogenic *Escherichia coli*  
548 outer membrane proteome during growth in human urine. *Infect Immun* 75:2679-88.
- 549 31. Snyder JA, Haugen BJ, Buckles EL, Lockett CV, Johnson DE, Donnenberg MS, Welch  
550 RA, Mobley HL. 2004. Transcriptome of uropathogenic *Escherichia coli* during urinary  
551 tract infection. *Infect Immun* 72:6373-81.

- 552 32. Hagan EC, Lloyd AL, Rasko DA, Faerber GJ, Mobley HL. 2010. *Escherichia coli* global  
553 gene expression in urine from women with urinary tract infection. PLoS Pathog  
554 6:e1001187.
- 555 33. Subashchandrabose S, Hazen TH, Brumbaugh AR, Himpsl SD, Smith SN, Ernst RD,  
556 Rasko DA, Mobley HL. 2014. Host-specific induction of *Escherichia coli* fitness genes  
557 during human urinary tract infection. Proc Natl Acad Sci U S A 111:18327-32.
- 558 34. Hagan EC, Mobley HL. 2007. Uropathogenic *Escherichia coli* outer membrane antigens  
559 expressed during urinary tract infection. Infect Immun 75:3941-9.
- 560 35. Spurbeck RR, Dinh PC, Jr., Walk ST, Stapleton AE, Hooton TM, Nolan LK, Kim KS,  
561 Johnson JR, Mobley HL. 2012. *Escherichia coli* isolates that carry *vat*, *fyuA*, *chuA*, and  
562 *yfcV* efficiently colonize the urinary tract. Infect Immun 80:4115-22.
- 563 36. Lloyd AL, Rasko DA, Mobley HL. 2007. Defining genomic islands and uropathogen-  
564 specific genes in uropathogenic *Escherichia coli*. J Bacteriol 189:3532-46.
- 565 37. Torres AG, Redford P, Welch RA, Payne SM. 2001. TonB-dependent systems of  
566 uropathogenic *Escherichia coli*: aerobactin and heme transport and TonB are required for  
567 virulence in the mouse. Infection and immunity 69:6179-6185.
- 568 38. Russo TA, Carlino UB, Johnson JR. 2001. Identification of a New Iron-Regulated  
569 Virulence Gene, *ireA*, in an Extraintestinal Pathogenic Isolate of *Escherichia coli*.  
570 Infection and immunity 69:6209-6216.
- 571 39. Hagan EC, Mobley HL. 2009. Haem acquisition is facilitated by a novel receptor Hma  
572 and required by uropathogenic *Escherichia coli* for kidney infection. Molecular  
573 microbiology 71:79-91.
- 574 40. Hancock V, Ferrieres L, Klemm P. 2008. The ferric yersiniabactin uptake receptor FyuA  
575 is required for efficient biofilm formation by urinary tract infectious *Escherichia coli* in  
576 human urine. Microbiology 154:167-175.
- 577 41. Levine MM, Kaper JB, Black RE, Clements ML. 1983. New knowledge on pathogenesis  
578 of bacterial enteric infections as applied to vaccine development. Microbiological  
579 reviews 47:510-550.
- 580 42. R. E. 1997. Adjuvants for the future, p 173-192. In Levine MM WG, Kaper JB (ed), New  
581 Generation Vaccines. Marcel Dekker, Inc., New York.
- 582 43. Morefield GL, Sokolovska A, Jiang D, HogenEsch H, Robinson JP, Hem SL. 2005. Role  
583 of aluminum-containing adjuvants in antigen internalization by dendritic cells in vitro.  
584 Vaccine 23:1588-1595.
- 585 44. Li H, Willingham SB, Ting JPY, Re F. 2008. Cutting edge: inflammasome activation by  
586 alum and alum's adjuvant effect are mediated by NLRP3. Journal of immunology  
587 (Baltimore, Md : 1950) 181:17-21.
- 588 45. Mata-Haro V, Cekic C, Martin M, Chilton PM, Casella CR, Mitchell TC. 2007. The  
589 vaccine adjuvant monophosphoryl lipid A as a TRIF-biased agonist of TLR4. Science  
590 (New York, NY) 316:1628-1632.
- 591 46. Fransen F, Boog CJ, van Putten JP, van der Ley P. 2007. Agonists of Toll-like receptors  
592 3, 4, 7, and 9 are candidates for use as adjuvants in an outer membrane vaccine against  
593 *Neisseria meningitidis* serogroup B. Infection and immunity 75:5939-5946.
- 594 47. Rhee EG, Kelley RP, Agarwal I, Lynch DM, La Porte A, Simmons NL, Clark SL,  
595 Barouch DH. 2010. TLR4 ligands augment antigen-specific CD8+ T lymphocyte  
596 responses elicited by a viral vaccine vector. Journal of virology 84:10413-10419.

- 597 48. Klinman DM, Barnhart KM, Conover J. 1999. CpG motifs as immune adjuvants. *Vaccine*  
598 17:19-25.
- 599 49. Krieg AM, Davis HL. 2001. Enhancing vaccines with immune stimulatory CpG DNA.  
600 *Current opinion in molecular therapeutics* 3:15-24.
- 601 50. Sun S, Kishimoto H, Sprent J. 1998. DNA as an adjuvant: capacity of insect DNA and  
602 synthetic oligodeoxynucleotides to augment T cell responses to specific antigen. *The*  
603 *Journal of experimental medicine* 187:1145-1150.
- 604 51. Coffman RL, Sher A, Seder RA. 2010. Vaccine adjuvants: putting innate immunity to  
605 work. *Immunity* 33:492-503.
- 606 52. Clements JD, Norton EB. 2018. The Mucosal Vaccine Adjuvant LT(R192G/L211A) or  
607 dmLT. *mSphere* 3:e00215-18.
- 608 53. Hogenesch H. 2013. Mechanism of immunopotentiality and safety of aluminum  
609 adjuvants. *Frontiers in immunology* 3:406-406.
- 610 54. Mata-Haro V, Cekic C, Martin M, Chilton PM, Casella CR, Mitchell TC. 2007. The  
611 Vaccine Adjuvant Monophosphoryl Lipid A as a TRIF-Biased Agonist of TLR4. *Science*  
612 316:1628-1632.
- 613 55. Didierlaurent AM, Morel S, Lockman L, Giannini SL, Bisteau M, Carlsen H, Kielland A,  
614 Vosters O, Vanderheyde N, Schiavetti F, Larocque D, Van Mechelen M, Garçon N.  
615 2009. AS04, an Aluminum Salt- and TLR4 Agonist-Based Adjuvant System, Induces a  
616 Transient Localized Innate Immune Response Leading to Enhanced Adaptive Immunity.  
617 *The Journal of Immunology* 183:6186-6197.
- 618 56. Storni T, Ruedl C, Schwarz K, Schwendener RA, Renner WA, Bachmann MF. 2004.  
619 Nonmethylated CG motifs packaged into virus-like particles induce protective cytotoxic  
620 T cell responses in the absence of systemic side effects. *J Immunol* 172:1777-85.
- 621 57. Chaput N, Scharz NE, Andre F, Taieb J, Novault S, Bonnaventure P, Aubert N, Bernard  
622 J, Lemonnier F, Merad M, Adema G, Adams M, Ferrantini M, Carpentier AF, Escudier  
623 B, Tursz T, Angevin E, Zitvogel L. 2004. Exosomes as potent cell-free peptide-based  
624 vaccine. II. Exosomes in CpG adjuvants efficiently prime naive Tc1 lymphocytes leading  
625 to tumor rejection. *J Immunol* 172:2137-46.
- 626 58. Wettstein PJ, Borson ND, Park JG, McNallan KT, Reed AM. 2005. Cysteine-tailed class  
627 I-binding peptides bind to CpG adjuvant and enhance primary CTL responses. *J Immunol*  
628 175:3681-9.
- 629 59. Kim YC, Jarrachian C, Zehrung D, Mitragotri S, Prausnitz MR. 2012. Delivery systems  
630 for intradermal vaccination. *Current topics in microbiology and immunology* 351:77-112.
- 631 60. Coleman BL, McGeer AJ, Halperin SA, Langley JM, Shamout Y, Taddio A, Shah V,  
632 McNeil SA. 2012. A randomized control trial comparing immunogenicity, safety, and  
633 preference for self- versus nurse-administered intradermal influenza vaccine. *Vaccine*  
634 30:6287-6293.
- 635 61. Neutra MR, Kozlowski PA. 2006. Mucosal vaccines: the promise and the challenge.  
636 *Nature Reviews Immunology* 6:148-158.
- 637 62. Gebril A, Alsaadi M, Acevedo R, Mullen AB, Ferro VA. 2012. Optimizing efficacy of  
638 mucosal vaccines. *Expert review of vaccines* 11:1139-1155.
- 639 63. Kozlowski PA, Williams SB, Lynch RM, Flanigan TP, Patterson RR, Cu-Uvin S, Neutra  
640 MR. 2002. Differential induction of mucosal and systemic antibody responses in women  
641 after nasal, rectal, or vaginal immunization: influence of the menstrual cycle. *Journal of*  
642 *immunology (Baltimore, Md : 1950)* 169:566-574.

- 643 64. Staats HF, Montgomery SP, Palker TJ. 1997. Intranasal immunization is superior to  
644 vaginal, gastric, or rectal immunization for the induction of systemic and mucosal anti-  
645 HIV antibody responses. *AIDS research and human retroviruses* 13:945-952.
- 646 65. Imaoka K, Miller CJ, Kubota M, McChesney MB, Lohman B, Yamamoto M, Fujihashi  
647 K, Someya K, Honda M, McGhee JR, Kiyono H. 1998. Nasal immunization of  
648 nonhuman primates with simian immunodeficiency virus p55gag and cholera toxin  
649 adjuvant induces Th1/Th2 help for virus-specific immune responses in reproductive  
650 tissues. *Journal of immunology (Baltimore, Md : 1950)* 161:5952-5958.
- 651 66. Rudin A, Riise GC, Holmgren J. 1999. Antibody responses in the lower respiratory tract  
652 and male urogenital tract in humans after nasal and oral vaccination with cholera toxin B  
653 subunit. *Infection and immunity* 67:2884-2890.
- 654 67. Mestecky J. 1987. The common mucosal immune system and current strategies for  
655 induction of immune responses in external secretions. *Journal of clinical immunology*  
656 7:265-276.
- 657 68. Kunkel EJ, Butcher EC. 2003. Plasma-cell homing. *Nature Reviews Immunology* 3:822-  
658 829.
- 659 69. Habibi M, Asadi Karam MR, Bouzari S. 2015. Evaluation of the effect of MPL and  
660 delivery route on immunogenicity and protectivity of different formulations of FimH and  
661 MrpH from uropathogenic *Escherichia coli* and *Proteus mirabilis* in a UTI mouse model.  
662 *International Immunopharmacology* 28:70-78.
- 663 70. Lencer WI, Saslowsky D. 2005. Raft trafficking of AB5 subunit bacterial toxins.  
664 *Biochimica et biophysica acta* 1746:314-321.
- 665 71. Wang H, Paton JC, Herdman BP, Rogers TJ, Beddoe T, Paton AW. 2013. The B subunit  
666 of an AB5 toxin produced by *Salmonella enterica serovar Typhi* up-regulates  
667 chemokines, cytokines, and adhesion molecules in human macrophage, colonic epithelial,  
668 and brain microvascular endothelial cell lines. *Infection and immunity* 81:673-683.
- 669 72. Beddoe T, Paton AW, Le Nours J, Rossjohn J, Paton JC. 2010. Structure, biological  
670 functions and applications of the AB5 toxins. *Trends in biochemical sciences* 35:411-  
671 418.
- 672 73. Norton EB, Lawson LB, Mahdi Z, Freytag LC, Clements JD. 2012. The A Subunit of  
673 *Escherichia coli* Heat-Labile Enterotoxin Functions as a Mucosal Adjuvant and Promotes  
674 IgG2a, IgA, and Th17 Responses to Vaccine Antigens. *Infection and Immunity* 80:2426-  
675 2435.
- 676 74. Sivick KE, Schaller MA, Smith SN, Mobley HL. 2010. The innate immune response to  
677 uropathogenic *Escherichia coli* involves IL-17A in a murine model of urinary tract  
678 infection. *The journal of immunology* 184:2065-2075.
- 679 75. Snyder JA, Haugen BJ, Buckles EL, Lockett CV, Johnson DE, Donnenberg MS, Welch  
680 RA, Mobley HLT. 2004. Transcriptome of uropathogenic *Escherichia coli* during urinary  
681 tract infection. *Infection and immunity* 72:6373-6381.
- 682 76. Hagan EC, Lloyd AL, Rasko DA, Faerber GJ, Mobley HLT. 2010. *Escherichia coli*  
683 global gene expression in urine from women with urinary tract infection. *PLoS pathogens*  
684 6:e1001187-e1001187.
- 685 77. Sintsova A, Frick-Cheng AE, Smith S, Pirani A, Subashchandrabose S, Snitkin ES,  
686 Mobley H. 2019. Genetically diverse uropathogenic *Escherichia coli* adopt a common  
687 transcriptional program in patients with UTIs. *eLife* 8:e49748.

- 688 78. Mobley HL, Green DM, Trifillis AL, Johnson DE, Chippendale GR, Lockett CV, Jones  
689 BD, Warren JW. 1990. Pyelonephritogenic *Escherichia coli* and killing of cultured  
690 human renal proximal tubular epithelial cells: role of hemolysin in some strains. *Infection*  
691 and immunity 58:1281-1289.
- 692 79. Hacker J, Knapp S, Goebel W. 1983. Spontaneous deletions and flanking regions of the  
693 chromosomally inherited hemolysin determinant of an *Escherichia coli* O6 strain. *Journal*  
694 of bacteriology 154:1145-1152.
- 695 80. Ichinohe T, Watanabe I, Ito S, Fujii H, Moriyama M, Tamura S-I, Takahashi H, Sawa H,  
696 Chiba J, Kurata T, Sata T, Hasegawa H. 2005. Synthetic double-stranded RNA poly(I:C)  
697 combined with mucosal vaccine protects against influenza virus infection. *Journal of*  
698 virology 79:2910-2919.
- 699 81. Marshall JD, Fearon KL, Higgins D, Hessel EM, Kanzler H, Abbate C, Yee P, Gregorio  
700 J, Cruz TD, Lizcano JO, Zolotarev A, McClure HM, Brasky KM, Murthy KK, Coffman  
701 RL, Nest GV. 2005. Superior Activity of the Type C Class of ISS In Vitro and In Vivo  
702 Across Multiple Species. *DNA and Cell Biology* 24:63-72.
- 703 82. Romero CD, Varma TK, Hobbs JB, Reyes A, Driver B, Sherwood ER. 2011. The Toll-  
704 like receptor 4 agonist monophosphoryl lipid a augments innate host resistance to  
705 systemic bacterial infection. *Infection and immunity* 79:3576-3587.
- 706 83. Lindblad EB, Schønberg NE. 2010. Aluminum Adjuvants: Preparation, Application,  
707 Dosage, and Formulation with Antigen, p 41-58. *In* Davies G (ed), *Vaccine Adjuvants:*  
708 *Methods and Protocols* doi:10.1007/978-1-60761-585-9\_4. Humana Press, Totowa, NJ.
- 709 84. Norton EB, Lawson LB, Freytag LC, Clements JD. 2011. Characterization of a mutant  
710 *Escherichia coli* heat-labile toxin, LT(R192G/L211A), as a safe and effective oral  
711 adjuvant. *Clinical and vaccine immunology : CVI* 18:546-551.
- 712 85. Johnson DE, Lockett CV, Hall-Craigs M, Mobley HL, Warren JW. 1987.  
713 Uropathogenicity in rats and mice of *Providencia stuartii* from long-term catheterized  
714 patients. *J Urol* 138:632-5.

716 **Figure Legends**

717

718 **Figure 1. Comparison of adjuvants administered intranasally and formulated with the**  
719 **antigens Hma, IutA, FyuA, or IreA.** Seven to eight-week old female CBA/J mice were  
720 immunized intranasally according to our immunization schedule with adjuvant alone (Ctl) or  
721 adjuvant formulated with 100 µg LPS free antigen, either Hma (A, E, I), IutA (B, F, J), FyuA (C,  
722 G, K), or IreA (D, H, L). Adjuvants tested included unmethylated CpG synthetic  
723 oligodeoxynucleotides (CpG), polyinosinic:polycytidylic acid (polyIC), or detoxified *E. coli*  
724 enterotoxin (dmLT). One week after the final boost, mice were challenged with 10<sup>8</sup> colony  
725 forming units (CFU) of *E. coli* strain CFT073 (Hma, IreA, IutA) or 536 (FyuA) via transurethral  
726 inoculation. Forty-eight hours post inoculation, urine was collected, mice were sacrificed,  
727 bladder and kidneys homogenized, and aliquots plated on LB agar for enumeration of bacterial  
728 burden. Bars indicate the median CFU in the urine (A - D), bladder (E - H), and kidneys (I - L).  
729 Symbols represent individual mice. N = 5 - 30. Dashed line represents the limit of detection. *P*  
730 values were determined using a two-tailed Mann-Whitney test.

731

732 **Figure 2. Intranasal vaccination with outer membrane iron receptors generates a robust**  
733 **antigen-specific serum IgG response.** Antigen-specific IgG concentrations quantified by  
734 indirect ELISA in serum collected from female CBA/J mice one week after final boost. Mice  
735 were intranasally immunized with adjuvant alone (Ctl) or adjuvant formulated with 100 µg of  
736 purified, LPS free antigen (Hma, IreA, FyuA, IutA). Adjuvants utilized were (A) detoxified *E.*  
737 *coli* enterotoxin, dmLT, (B) polyinosinic:polycytidylic acid, polyIC, and (C) unmethylated CpG

738 synthetic oligodeoxynucleotides, CpG. Each bar represents the median and each symbol  
739 represents an individual mouse.  $N = 5 - 20$ .  $P$  values were determined using a two-tailed Mann-  
740 Whitney test. \*\*\*  $P \leq 0.001$ , \*\*  $P \leq 0.01$ , \*  $P \leq 0.05$ .

741

742 **Figure 3. Intramuscular vaccination with outer membrane iron receptors generates a**  
743 **robust antigen-specific serum IgG response when alum or MPLA are used as adjuvants.**

744 Antigen-specific IgG concentrations quantified by indirect ELISA in serum collected from  
745 female CBA/J mice one week after final boost. Mice were intramuscularly immunized with  
746 adjuvant alone (Ctl) or adjuvant formulated with 100  $\mu\text{g}$  of purified, LPS free antigen (Hma,  
747 IreA, FyuA, IutA). Adjuvants utilized were (A) detoxified *E. coli* enterotoxin, dmLT, (B)  
748 polyinosinic:polycytidylic acid, polyIC, (C) alum, and (D) monophosphoryl lipid A, MPLA.  
749 Note the change in scale in panel D. Each bar represents the median and each symbol represents  
750 an individual mouse.  $N = 10 - 20$ .  $P$  values were determined using a two-tailed Mann-Whitney  
751 test. \*\*\*  $P \leq 0.001$ , \*\*  $P \leq 0.01$ .

752

### 753 **Supplemental Figure Legends**

754 **Supplemental Figure 1. Inocula are consistent across experimental trials and strains.**

755 Inoculating doses of UPEC in CFU/mL administered transurethrally to female CBA/J mice one  
756 week following final boost. Mice were inoculated with strain CFT073 following immunization  
757 with Hma, IreA or IutA, or inoculated with strain 536 following immunization with FyuA. The  
758 intended dose was  $2 \times 10^9$  CFU/mL. Whiskers indicate maximum and minimum, box indicates

759 25<sup>th</sup> and 75<sup>th</sup> percentiles, bar indicates the median. N = 6 – 26. No statistical difference was  
760 found via two-tailed Mann-Whitney test.

761

762 **Supplemental Figure 2. Immunizing with CpG or polyIC in the absence of antigen does not**  
763 **affect colonization of the urinary tract by UPEC.** Seven to eight-week old female CBA/J mice  
764 were immunized intranasally according to our immunization schedule with the adjuvants:  
765 unmethylated CpG synthetic oligodeoxynucleotides (CpG), detoxified *E. coli* enterotoxin  
766 (dmLT), or polyinosinic:polycytidylic acid (polyIC). One week after the final boost, mice were  
767 transurethrally challenged with 10<sup>8</sup> CFU of CFT073. Forty-eight hours post inoculation, urine  
768 was collected, mice were sacrificed, bladder and kidneys homogenized, and aliquots plated on  
769 LB agar for enumeration of bacterial burden. Bars indicate the median CFU in the urine (A),  
770 bladder (B), and kidneys (C). Symbols represent individual mice. N = 5-40. The limit of  
771 detection is 100 CFU/mL urine or /g tissue. Dotted line represents colonization level observed in  
772 unimmunized mice challenged with CFT073. *P* values shown where addition of adjuvant was  
773 protective as determined using a two-tailed Mann-Whitney test.

774

775 **Supplemental Figure 3. Subcutaneous vaccination with outer membrane iron receptors**  
776 **generates an antigen-specific serum IgG response.** Antigen-specific IgG concentrations  
777 quantified by indirect ELISA in pooled serum collected from female CBA/J mice one week after  
778 final boost. Mice were subcutaneously immunized with adjuvant alone (Ctl) or adjuvant  
779 formulated with 100 µg of purified, LPS free antigen (Hma, IreA, FyuA, IutA). Adjuvants  
780 utilized were: detoxified *E. coli* enterotoxin, (dmLT), polyinosinic:polycytidylic acid (polyIC),



781 alum, and monophosphoryl lipid A (MPLA). Each bar represents the mean from four technical  
782 replicates of serum pooled from 10 mice from either one or two experimental trials, error bars  
783 indicate standard deviation. *P* values were determined using a two-tailed Mann-Whitney test. \*\*  
784  $P \leq 0.01$ , \*  $P \leq 0.05$ .

785

786 **Supplemental Figure 4. Antigen-specific serum antibodies do not correlate with protection**  
787 **against UTI.** The CFU/mL urine or /g tissue (y-axis) of all vaccination trials that significantly  
788 reduced bacterial burden (see Figure 1 and 3) were correlated with antigen-specific serum IgG  
789 concentration measured by ELISA (x-axis). Seven to eight-week old female CBA/J mice were  
790 immunized intranasally according to our immunization schedule with detoxified *E. coli*  
791 enterotoxin (dmLT) formulated with Hma (A), dmLT-IutA (B), polyinosinic:polycytidylic acid  
792 formulated with IutA (C), or unmethylated CpG synthetic oligodeoxynucleotides formulated  
793 with IutA (D). Each symbol represents a single mouse. Open symbols represent mice immunized  
794 with adjuvant alone, closed symbols represent mice immunized with adjuvant formulated with  
795 antigen. N = 5-17. No significant correlations were found using Pearsons correlation coefficient.

796

797 **Table 1. Median fold change in CFU in the urine, bladder and kidneys of immunized mice.**

798

799 **Supplemental Table 1. Percent of immunized mice without detectable CFU following**  
800 **transurethral challenge.**

801

802 **Supplemental Table 2. Doses for each adjuvant by route of administration.**

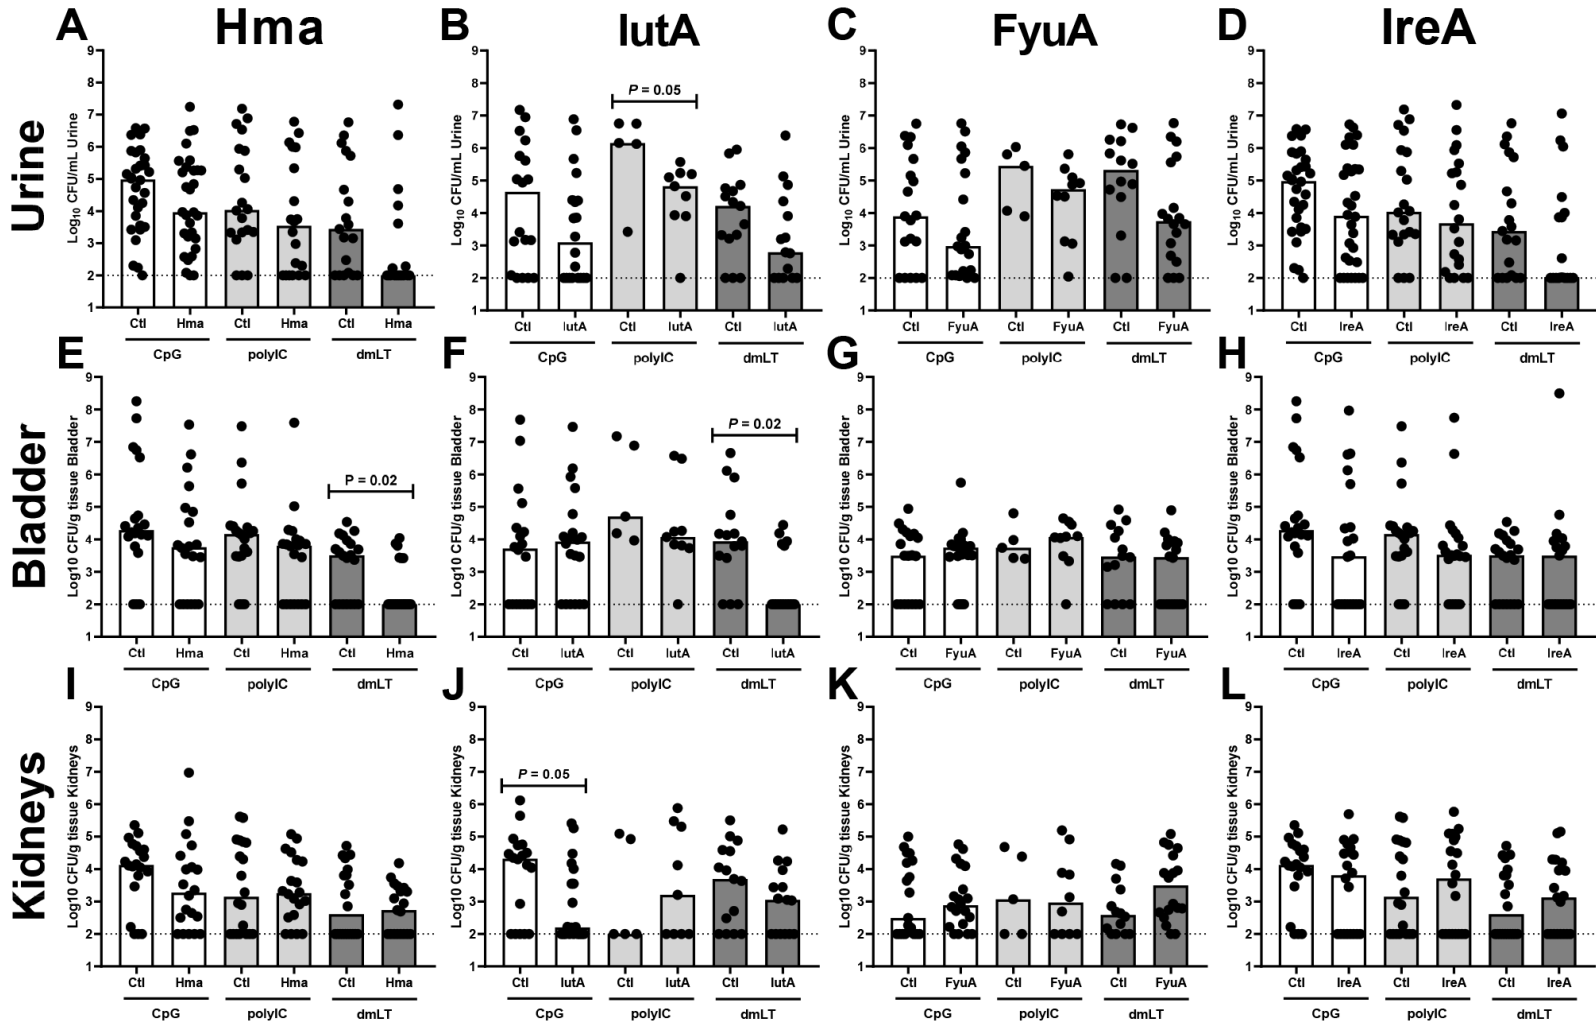

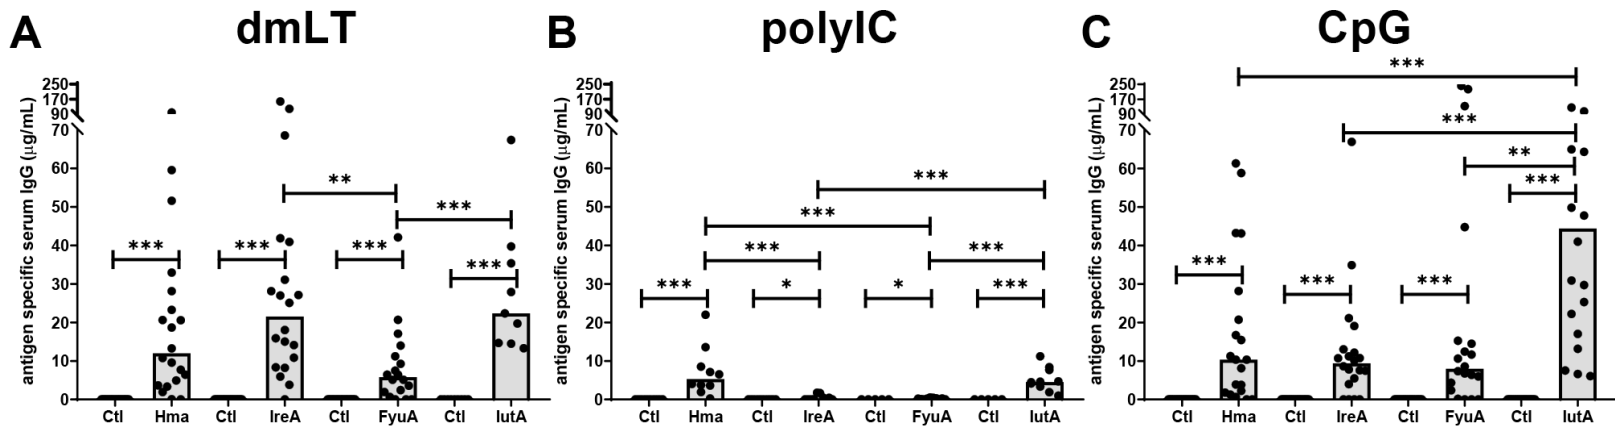

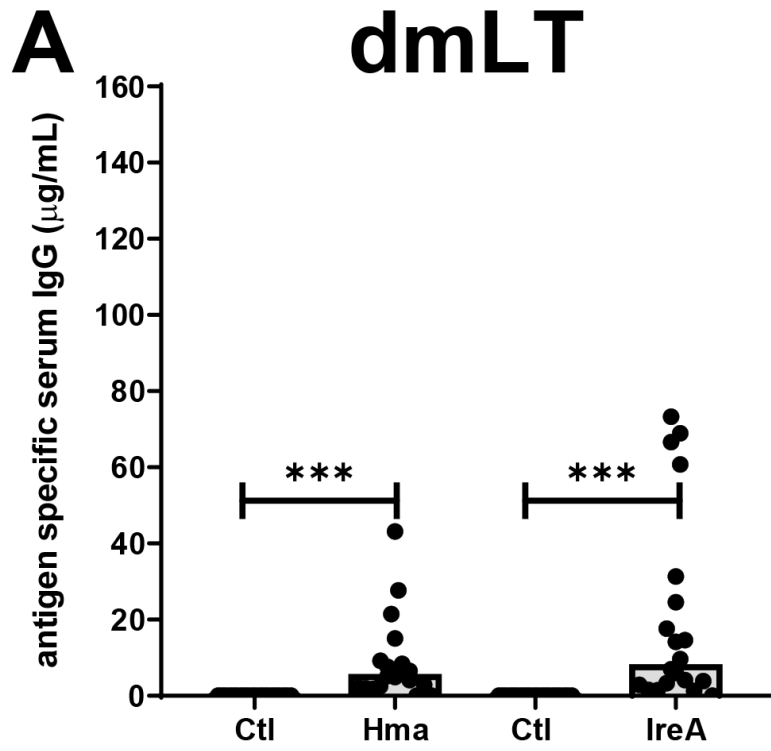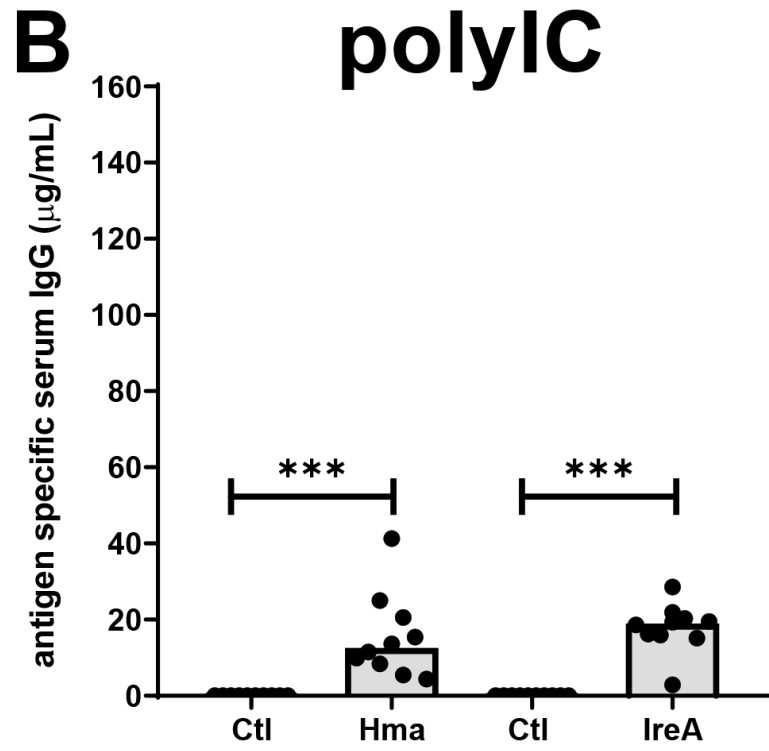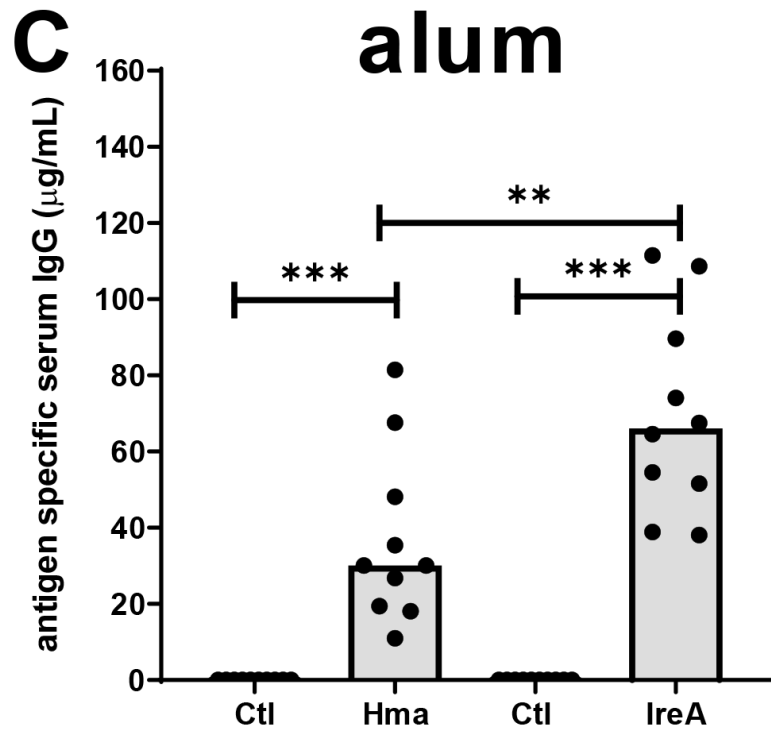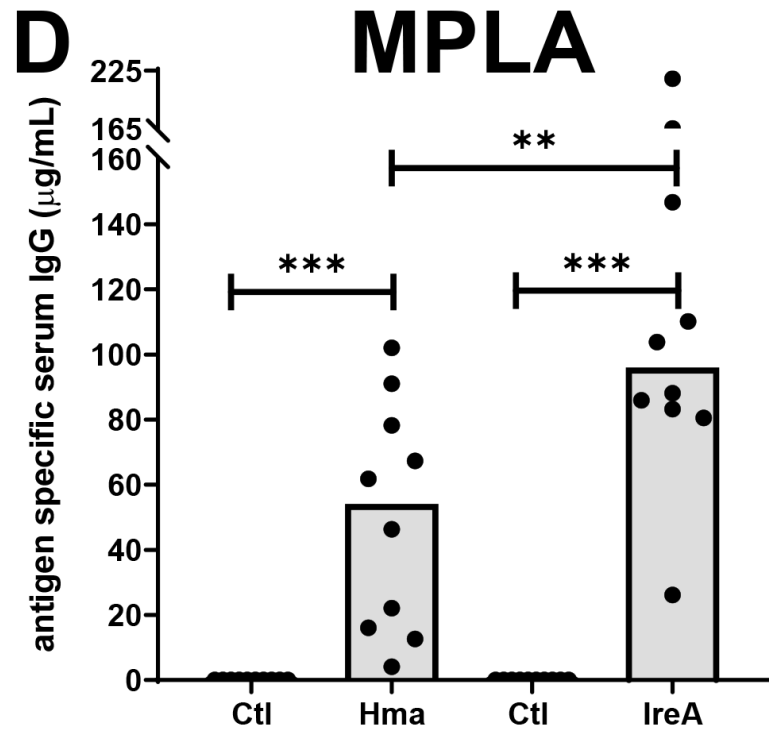

| Route           | Adjuvant            | Antigen | Urine                        |                                   |                          |                      | Bladder         |                      |              |               | Kidneys         |                      |               |               |
|-----------------|---------------------|---------|------------------------------|-----------------------------------|--------------------------|----------------------|-----------------|----------------------|--------------|---------------|-----------------|----------------------|---------------|---------------|
|                 |                     |         | Median Adj Only <sup>a</sup> | Median Adj + Antigen <sup>b</sup> | Fold Change <sup>c</sup> | P value <sup>d</sup> | Median Adj Only | Median Adj + Antigen | Fold Change  | P value       | Median Adj Only | Median Adj + Antigen | Fold Change   | P value       |
| IM <sup>e</sup> | alum                | Hma     | 1840                         | 105300                            | 0.02                     | <b>0.0257</b>        | 100             | 8670                 | 0.01         | 0.2628        | 10940           | 6860                 | 1.59          | 0.9861        |
| IM              | alum                | IreA    | 1840                         | 7285                              | 0.25                     | 0.0664               | 100             | 2950                 | 0.03         | 0.9709        | 10940           | 10045                | 1.09          | 0.5761        |
| IM              | polyIC <sup>f</sup> | Hma     | 23100                        | 734500                            | 0.03                     | 0.4973               | 6735            | 37350                | 0.18         | <b>0.0522</b> | 9650            | 3975                 | <b>2.43</b>   | 0.2834        |
| IM              | polyIC              | IreA    | 23100                        | 106000                            | 0.22                     | 0.6421               | 6735            | 13550                | 0.50         | 0.5326        | 9650            | 750                  | <b>12.87</b>  | 0.1808        |
| IM              | MPLA <sup>g</sup>   | Hma     | 105350                       | 562500                            | 0.19                     | 0.4813               | 100             | 4810                 | 0.02         | 0.3285        | 3455            | 13620                | 0.25          | 0.3888        |
| IM              | MPLA                | IreA    | 105350                       | 17100                             | <b>6.16</b>              | 0.2466               | 100             | 1690                 | 0.06         | 0.7799        | 3455            | 470                  | <b>7.35</b>   | 0.8994        |
| IM              | dmLT <sup>h</sup>   | Hma     | 218500                       | 101100                            | <b>2.16</b>              | 0.3440               | 28200           | 92650                | 0.30         | 0.4311        | 40400           | 6650                 | <b>6.08</b>   | 0.2400        |
| IM              | dmLT                | IreA    | 218500                       | 36500                             | <b>5.99</b>              | 0.1127               | 28200           | 14500                | 1.94         | 0.7275        | 40400           | 11000                | <b>3.67</b>   | 0.7252        |
| IN <sup>i</sup> | polyIC              | Hma     | 10950                        | 3500                              | <b>3.13</b>              | 0.2409               | 14600           | 6355                 | <b>2.30</b>  | 0.1009        | 1409            | 1810                 | 0.78          | >0.9999       |
| IN              | polyIC              | IreA    | 10950                        | 4845                              | <b>2.26</b>              | 0.4122               | 14600           | 3330                 | <b>4.38</b>  | 0.1457        | 1409            | 5125                 | 0.27          | 0.7937        |
| IN              | polyIC              | FyuA    | 284000                       | 54100                             | <b>5.25</b>              | 0.3097               | 5500            | 11800                | 0.47         | 0.5941        | 1180            | 927                  | 1.27          | >0.9999       |
| IN              | polyIC              | IutA    | 1440000                      | 66700                             | <b>21.59</b>             | <b>0.0599</b>        | 50900           | 11800                | <b>4.31</b>  | 0.1469        | 640             | 1600                 | 0.40          | 0.5804        |
| IN              | dmLT                | Hma     | 2790                         | 100                               | <b>27.90</b>             | 0.0693               | 3205            | 100                  | <b>32.05</b> | <b>0.0240</b> | 407             | 542                  | 0.75          | 0.6033        |
| IN              | dmLT                | IreA    | 2790                         | 105                               | <b>26.57</b>             | 0.3674               | 3205            | 3170                 | 1.01         | 0.9020        | 407             | 1340                 | 0.30          | 0.7087        |
| IN              | dmLT                | FyuA    | 210450                       | 5605                              | <b>37.55</b>             | 0.0825               | 2955            | 2835                 | 1.04         | 0.4233        | 387             | 3159                 | 0.12          | <b>0.0476</b> |
| IN              | dmLT                | IutA    | 16400                        | 619                               | <b>26.49</b>             | 0.1866               | 8610            | 100                  | <b>86.10</b> | <b>0.0181</b> | 4950            | 1130                 | <b>4.38</b>   | 0.2536        |
| IN              | CpG <sup>j</sup>    | Hma     | 97050                        | 9285                              | <b>10.45</b>             | 0.4332               | 19350           | 5755                 | <b>3.36</b>  | 0.1321        | 13500           | 1885                 | <b>7.16</b>   | 0.1419        |
| IN              | CpG                 | IreA    | 97050                        | 8215                              | <b>11.81</b>             | 0.4944               | 19350           | 3035                 | <b>6.38</b>  | 0.0608        | 13500           | 6490                 | <b>2.08</b>   | 0.2991        |
| IN              | CpG                 | FyuA    | 7910                         | 961                               | <b>8.23</b>              | 0.6403               | 3130            | 5625                 | 0.56         | 0.8550        | 312             | 773                  | 0.40          | 0.8330        |
| IN              | CpG                 | IutA    | 44530                        | 1240                              | <b>35.91</b>             | 0.1959               | 5255            | 8570                 | 0.61         | 0.7791        | 21100           | 161                  | <b>131.06</b> | <b>0.0462</b> |
| SQ <sup>k</sup> | alum                | Hma     | 2218                         | 100                               | <b>22.18</b>             | 0.1246               | 3240            | 8205                 | 0.39         | 0.7940        | 198             | 100                  | 1.98          | 0.2391        |
| SQ              | alum                | IreA    | 2218                         | 3165                              | 0.70                     | 0.7828               | 3240            | 4655                 | 0.70         | 0.9271        | 198             | 2315                 | 0.09          | 0.3376        |
| SQ              | polyIC              | Hma     | 100                          | 1705                              | 0.06                     | 0.7168               | 1505            | 14650                | 0.10         | <b>0.0052</b> | 100             | 100                  | 1.00          | 0.4241        |
| SQ              | polyIC              | IreA    | 100                          | 1710                              | 0.06                     | 0.5473               | 1505            | 4410                 | 0.34         | 0.2559        | 100             | 9615                 | 0.01          | <b>0.0274</b> |
| SQ              | dmLT                | Hma     | 119000                       | 8955                              | <b>13.29</b>             | 0.3154               | 2750            | 2555                 | 1.08         | 0.9478        | 4390            | 12440                | 0.35          | 0.4422        |
| SQ              | dmLT                | IreA    | 119000                       | 213500                            | 0.56                     | 0.9048               | 2750            | 11360                | 0.24         | 0.7122        | 4390            | 4990                 | 0.88          | 0.9675        |
| SQ              | MPLA                | Hma     | 31900                        | 232600                            | 0.14                     | 0.7988               | 5240            | 13800                | 0.38         | 0.5935        | 41800           | 5615                 | <b>7.44</b>   | 0.2818        |
| SQ              | MPLA                | IreA    | 31900                        | 202000                            | 0.16                     | 0.4002               | 5240            | 14700                | 0.36         | 0.0810        | 41800           | 54650                | 0.76          | 0.2309        |

**Table 1. Median fold change in CFU in the urine, bladder and kidneys of immunized mice**

<sup>a</sup>Median CFU when immunized with the adjuvant alone.

<sup>b</sup>Median CFU when immunized with the adjuvant formulated with antigen.

<sup>c</sup>Fold change in median CFU when immunized with the adjuvant alone compared to mice immunized with the adjuvant formulated with antigen. Fold change greater than 2 are shown in bold.

<sup>d</sup>P value as determined by two tailed Mann-Whitney exact test. Significant differences are shown in bold.

<sup>e</sup>Intramuscular <sup>f</sup>Polyinosinic:polycytidylic acid <sup>g</sup>Monophosphoryl lipid A <sup>h</sup>Detoxified *E. coli* enterotoxin <sup>i</sup>Intranasal  
<sup>j</sup>Unmethylated CpG synthetic oligodeoxynucleotides <sup>k</sup>Subcutaneous
